# Supplementary material for: Haemaphysalislongicornis ticks are unable to transstadially transmit Theileria haneyi to horses
Source: Front Vet Sci. 2025 Apr 2;12:1572944. doi: 10.3389/fvets.2025.1572944 (PMC11999960; doi:10.3389/fvets.2025.1572944)
Supplement: SUPPLEMENTARY TABLE S1 — Transmission horse 1. [file Table_1.xlsx]

## Sheet: Sheet1
Transmission horse #1	T. haneyi PCR	Temp (C)	PCV (%)	WBC (K/ul)	Neutrophils WBC (K/ul)	Lymphocytes (K/ul)	Monocytes (K/ul)
Day 0	Neg	37.455	36.1	9.06	2.94	5.45	0.53
Day 1	Neg	37.345	31.5	8.46	3.29	4.47	0.55
Day 2	Neg	37.235	32.6	8.38	2.92	4.85	0.48
Day 3	Neg	37.125
Day 4	Neg	37.015	31.2	8.72	3.2	4.84	0.54
Day 5	Neg	37.455
Day 6	Neg	37.4	33.9	10.51	3.77	6.11	0.36
Day 7	Neg	37.565
Day 8	Neg	36.85	31.1	8.85	3.29	4.83	0.6
Day 9	Neg	37.125
Day 10	Neg	37.125	28.8	7.83	2.38	4.89	0.47
Day 11	Neg	38.335
Day 12	Neg	36.905	28.9	7.32	2.29	4.53	0.4
Day 13	Neg	36.575
Day 14	Neg	37.015	29.6	8.38	2.66	5.18	0.44
Day 15	Neg	37.18
Day 16	Neg	36.96	28.9	7.74	2.65	4.58	0.41
Day 17	Neg	36.52
Day 18	Neg	36.41	29.7	7.91	2.45	4.87	0.45
Day 19	Neg	37.015
Day 20	Neg	36.41	29.5	7.44	2.36	4.55	0.41
Day 21	Neg	36.905
Day 22	Neg	36.905	28.6	7.95	2.36	4.99	0.48
Day 23	Neg	36.63
Day 24	Neg	36.685	31.3	7.63	2.16	4.91	0.46
Day 25	Neg	35.97
Day 26	Neg	36.19	31.1	8.74	2.53	5.7	0.42
Day 27	Neg	35.97
Day 28	Neg	36.905	31.5	7.95	2.85	4.57	0.43
Day 29	Neg	37.1
Day 30	Neg	36.85	31.5	8.43	2.79	5.07	0.47
Day 31	Neg	37
Day 32	Neg	36.8	31.7	8.25	2.9	4.79	0.49
Day 33	Neg	37.2
Day 34	Neg	36.8	30.7	8.8	2.6	5.58	0.51
Day 35	Neg	36.7
Day 36	Neg	37.2	33.1	8.91	3.09	5.29	0.45
Day 37	Neg	36.85
Day 38	Neg	37.4	33.7	8.8	3.16	4.91	0.65
