# Supplementary material for: Haemaphysalislongicornis ticks are unable to transstadially transmit Theileria haneyi to horses
Source: Front Vet Sci. 2025 Apr 2;12:1572944. doi: 10.3389/fvets.2025.1572944 (PMC11999960; doi:10.3389/fvets.2025.1572944)
Supplement: SUPPLEMENTARY TABLE S2 — Transmission horse 2. [file Table_2.xlsx]

## Sheet: Sheet1
Transmission horse #2	T. haneyi PCR	Temp (C)	PCV (%)	WBC (K/ul)	Neutrophils WBC (K/ul)	Lymphocytes (K/ul)	Monocytes (K/ul)
Day 0	Neg	37.4	38.3	10.36	2.56	7.23	0.37
Day 1	Neg	37.29	36.1	12.17	3.44	7.84	0.61
Day 2	Neg	37.125	38.4	10.73	2.98	7.11	0.37
Day 3	Neg	37.29
Day 4	Neg	37.345	34.2	10.59	3.07	6.85	0.36
Day 5	Neg	37.345
Day 6	Neg	37.29	30.6	7.97	3.38	3.94	0.36
Day 7	Neg	36.96
Day 8	Neg	37.235	32.1	10.98	5.18	5.27	0.33
Day 9	Neg	36.905
Day 10	Neg	36.905	31.1	10.07	2.9	6.28	0.67
Day 11	Neg	37.29
Day 12	Neg	37.07	29.1	9.75	2.55	6.72	0.35
Day 13	Neg	36.685
Day 14	Neg	37.125	31.6	9.24	2.61	6.12	0.35
Day 15	Neg	36.74
Day 16	Neg	37.125	32.3	9.65	3.31	5.87	0.33
Day 17	Neg	36.85
Day 18	Neg	37.07	30.3	9.96	2.52	6.85	0.41
Day 19	Neg	36.52
Day 20	Neg	37.07	29.5	10.96	2.86	7.46	0.45
Day 21	Neg	36.795
Day 22	Neg	36.795	30	9.59	2.45	6.63	0.45
Day 23	Neg	36.63
Day 24	Neg	36.355	32.5	9.68	2.12	6.89	0.37
Day 25	Neg	36.63
Day 26	Neg	36.52	31.5	9.97	2.35	7	0.45
Day 27	Neg	36.74
Day 28	Neg	36.63	31.6	9.99	2.62	6.79	0.43
Day 29	Neg	36.905
Day 30	Neg	37.015	31.4	9.44	2.86	6.04	0.37
Day 31	Neg	36.8
Day 32	Neg	36.9	31.1	10.25	3.28	6.37	0.37
Day 33	Neg	37.125
Day 34	Neg	37.345	30.3	10.54	3.08	6.91	0.39
Day 35	Neg	36.8
Day 36	Neg	36.52	30.5	10.57	2.93	7.01	0.38
Day 37	Neg	36.905
Day 38	Neg	37.2	30.8	10.4	2.87	6.93	0.42
